# Supplementary material for: Transcription signatures encoded by ultraconserved genomic regions in human prostate cancer
Source: Mol Cancer. 2013 Feb 14;12:13. doi: 10.1186/1476-4598-12-13 (PMC3626580; doi:10.1186/1476-4598-12-13)
Supplement: Additional file 3: Table S3 — Listing the ucRNAs associated with extraprostatic disease extension. [file 1476-4598-12-13-S3.xls]

## Sheet: EPE p<0.001
Supplementary Table 3. ucRNAs associated with extraprostatic disease
ucRNA	Fold Change*	FDR (%)	P value	Type‡, host, host strand	Overlap with mRNA	Antisense to mRNA
uc.106+	0.66	0	0.000852	p, intronic to OLA1 (PTD004), antisense	Yes	Yes
uc.248+	0.68	0	0.000299	n, no gene	No
uc.190+	0.71	0	0.000689	n, FOXP4, sense	Yes
uc.334+A	1.23	4.3	0.000715	n, intronic to HNT, sense	No
uc.261+	1.42	4.7	0.000286	n, no gene	No
* Fold change, reference is tissue without extraprostatic extension status
‡ Type is based on the original annotation of UCRs (http://users.soe.ucsc.edu/~jill/ultra.html) with n = nonexonic, e = exonic, and p = possibly exonic.
